# Supplementary material for: Substrate-dependent resistance decrease of graphene by ultraviolet-ozone charge doping
Source: Royal Society of Chemistry journal article supplement (doi:10.1039/c6ra11044d), 2016-01-01
Supplement: c6ra11044d1.pdf [file c6ra11044d1.pdf]

## Supporting Information

### **Substrate-Dependent Resistance Decrease of Graphene by Ultraviolet-Ozone Charge Doping**

*Lihui Liu,<sup>1,\*</sup> Zhejian Cao,<sup>1</sup> Wei Wang,<sup>1</sup> Ergang Wang,<sup>2</sup> Yu Cao<sup>3</sup> and Zhaoyao Zhan<sup>1</sup>*

<sup>1</sup> Department of Microtechnology and Nanoscience, Chalmers University of Technology, Göteborg 41296, Sweden

<sup>2</sup> Department of Chemistry and Chemical Engineering, Chalmers University of Technology, Göteborg 41296, Sweden

<sup>3</sup> Department of Materials and Manufacturing Technology, Chalmers University of Technology, Göteborg 41296, Sweden

\*Correspondence email address: [lihui@chalmers.se](mailto:lihui@chalmers.se)

**Table S1.** Summarized literature results of the effect of UVO treatment on the resistance of graphene.

| 1       | Substrates          | UV light        |                                 | Ozone | Resistance [ $\Omega/\square$ ] after UVO exposure |                  |          |          |          | Work function [eV] |
|---------|---------------------|-----------------|---------------------------------|-------|----------------------------------------------------|------------------|----------|----------|----------|--------------------|
|         |                     | Wavelength [nm] | Intensity [mW/cm <sup>2</sup> ] |       | 0 min                                              | 3 min            | 5 min    | 10 min   | >10 min  |                    |
| 1 [1]   | -                   | -               | -                               | Yes   | Metal to insulator                                 |                  |          |          |          | -                  |
| 2 [2]   | Si/SiO <sub>2</sub> | 254             | 20                              | Yes   | 464                                                | 5354             | $\infty$ | $\infty$ | $\infty$ | -                  |
| 3 [3]   | Si/SiO <sub>2</sub> | 254             | -                               | Yes   | 2000                                               | -                | -        | 3000     | 9000     | -                  |
| 4 [4]   | Si/SiO <sub>2</sub> | 254             | -                               | Yes   | 90 <sup>a</sup>                                    | 110 <sup>a</sup> | -        | -        | -        | -                  |
| 5 [5]   | Si/SiO <sub>2</sub> | -               | -                               | Yes   | 350                                                | -                | -        | 400      | 420      | 4.9 to 4.83        |
| 6 [6]   | Si/SiO <sub>2</sub> | 254             | -                               | Yes   | 3800                                               | -                | -        | 1000     | 800      | -                  |
| 7 [7]   | Glass/ITO           | -               | 30                              | Yes   | 1000                                               | 1500             | 3000     | $\infty$ | $\infty$ | 4.3 to 4.85        |
| 8 [8]   | Si/SiO <sub>2</sub> | 220             | 11                              | No    | ~9000                                              |                  |          | -        | -        | -                  |
| 9 [9]   | Si/SiO <sub>2</sub> | 365             | -                               | No    | - <sup>b</sup>                                     |                  |          | -        | -        | -                  |
| 10 [10] | Ga/N                | 325             | 50 E-10 <sup>5</sup>            | No    | 4 E-6 to 2 E-4 <sup>c</sup>                        |                  |          | -        | -        | -                  |

a) Unit in  $\Omega/\square$ ; b)  $\mu_{\text{hole}} \approx 1200 \text{ cm}^2/\text{V}\cdot\text{s}$ ,  $\mu_{\text{electron}} \approx 760 \text{ cm}^2/\text{V}\cdot\text{s}$ ; c) the current value in A.

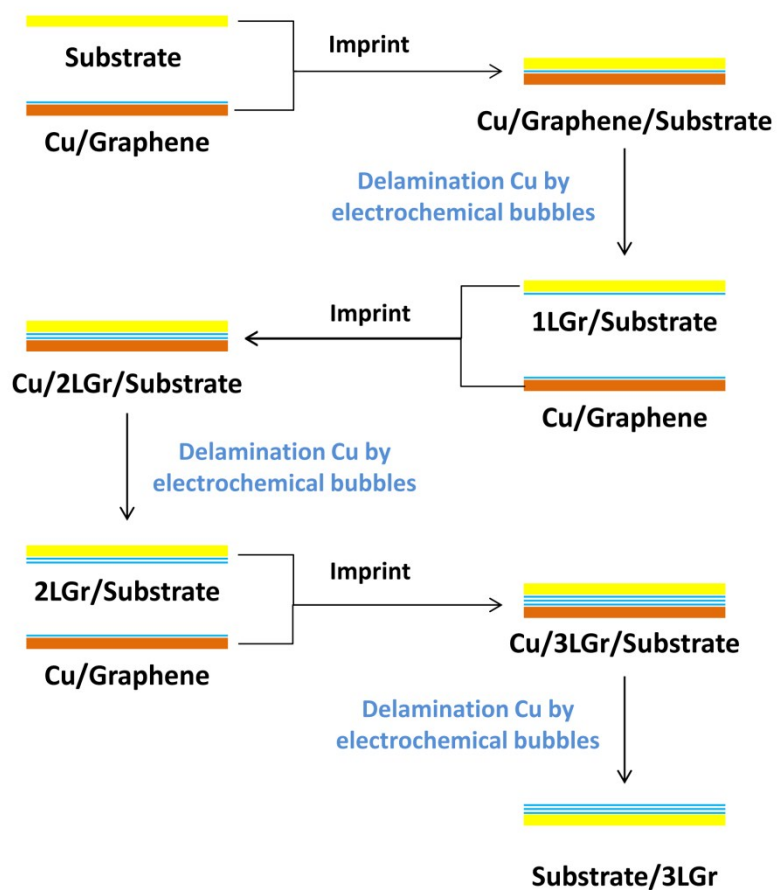

**Figure S1** Direct transfer of multilayer graphene on PTFE and paraffin film by the imprint and electrochemical bubbling delamination methods.

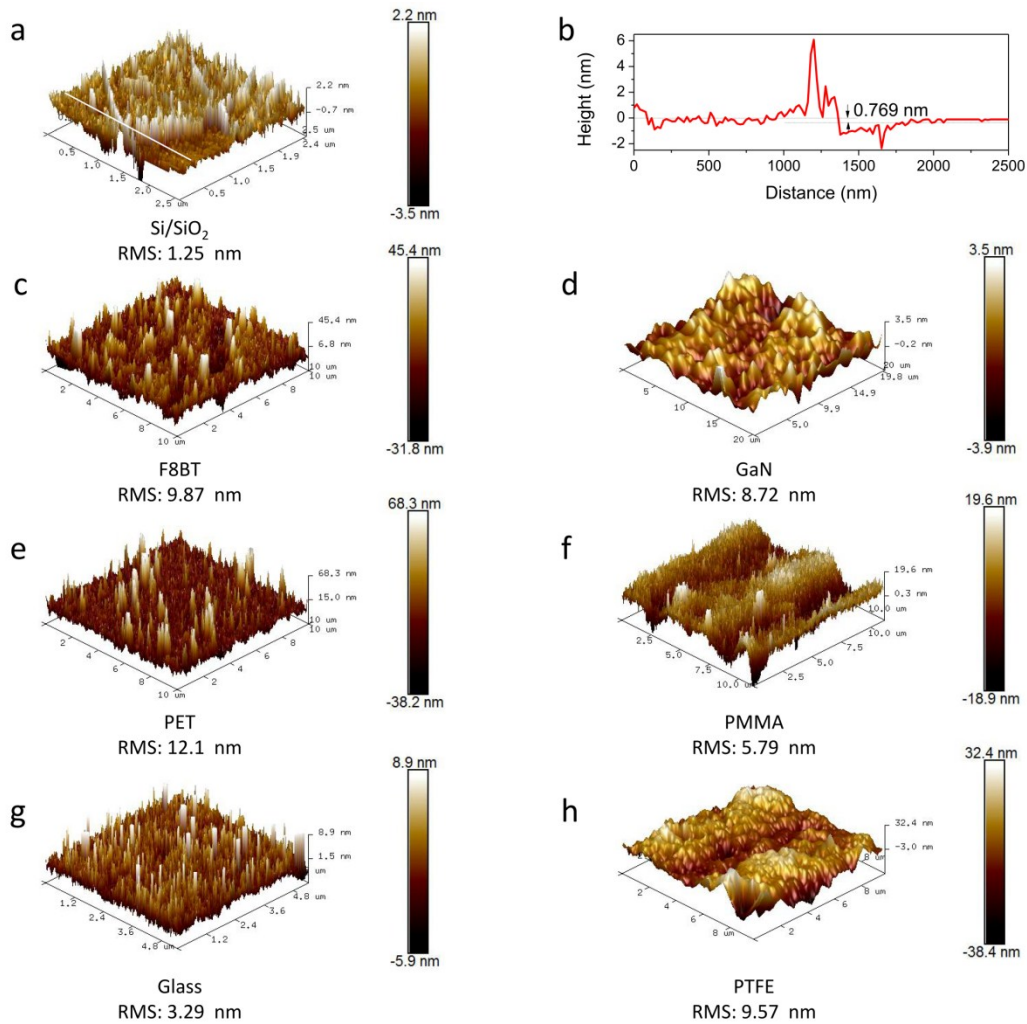

**Figure S2** AFM images and roughness values for graphene on different substrates. Figure b is the surface profile of graphene on Si/SiO<sub>2</sub>, the thickness of the one-time transferred graphene is 0.769 nm.

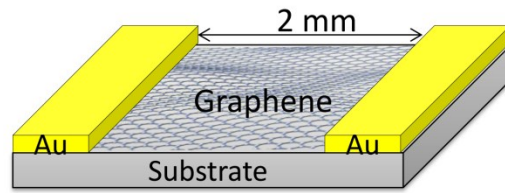

**Figure S3** Schematic of the graphene device for the resistance test on different substrates. The distance between the two Au electrodes is 2 mm and the width of graphene is 1 mm.

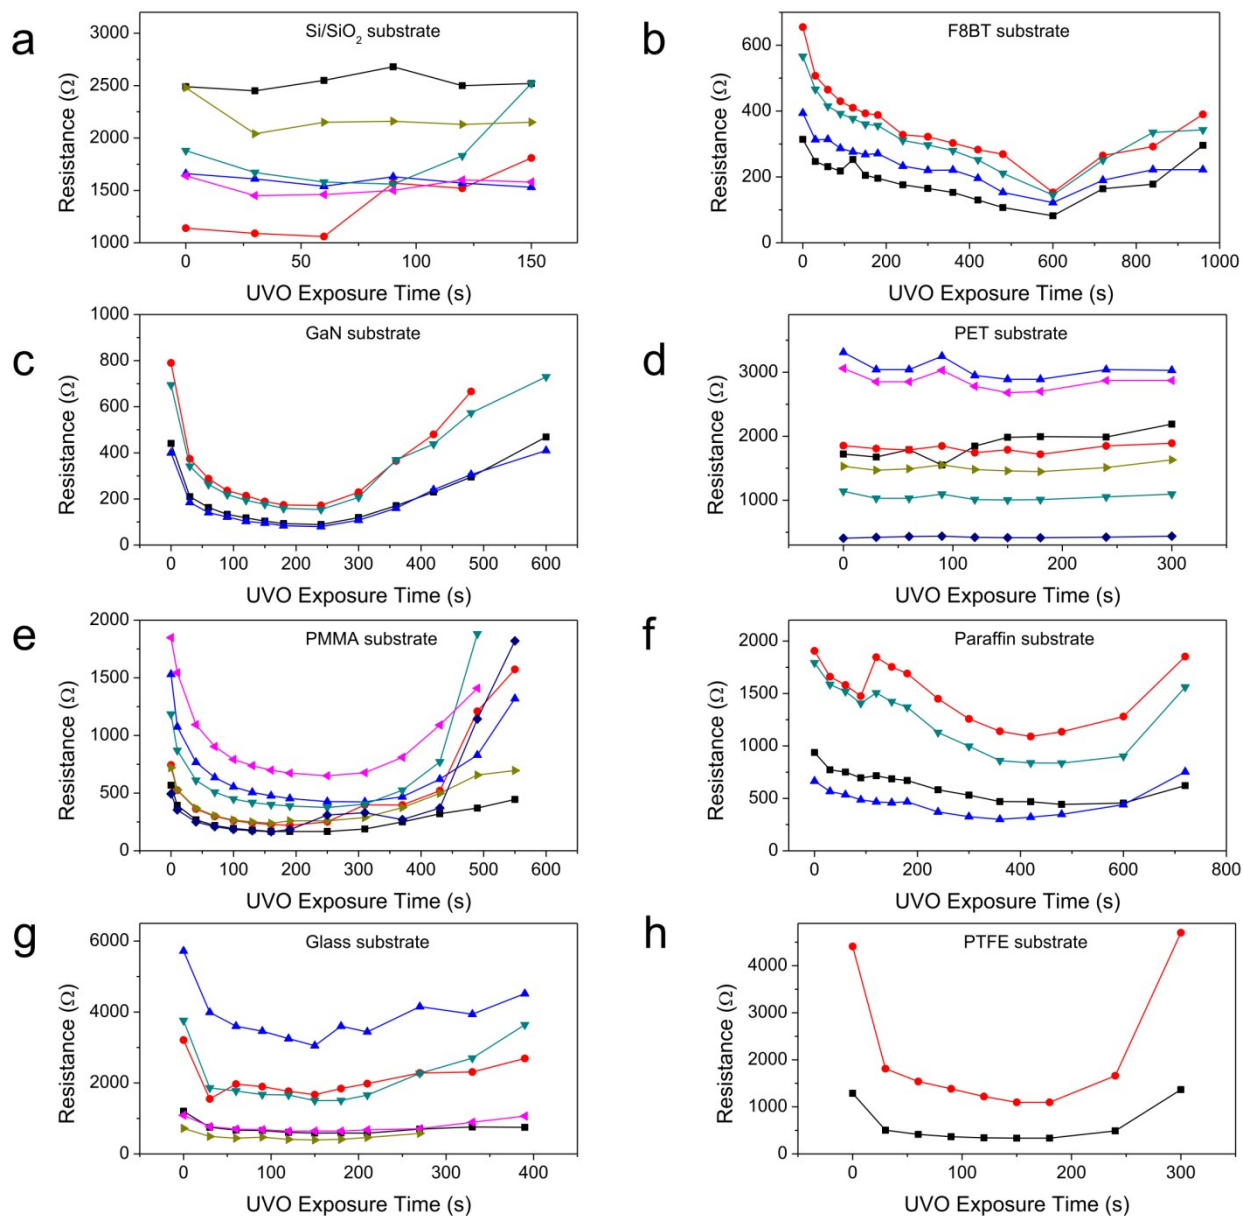

**Figure S4** Resistance change of graphene on different substrates using UVO treatment. (a) Monolayer graphene transferred to Si/SiO<sub>2</sub> substrate. (b) Monolayer graphene on F8BT film. (c) Monolayer graphene transferred to GaN substrate. (d) Monolayer graphene transferred to PET substrate. (e) Monolayer graphene on PMMA/PET substrate. (f) Multilayer (two layers) graphene on a paraffin film. (g) Monolayer graphene transferred to glass substrate. (g) Multilayer (three layers) graphene on a PTFE film.

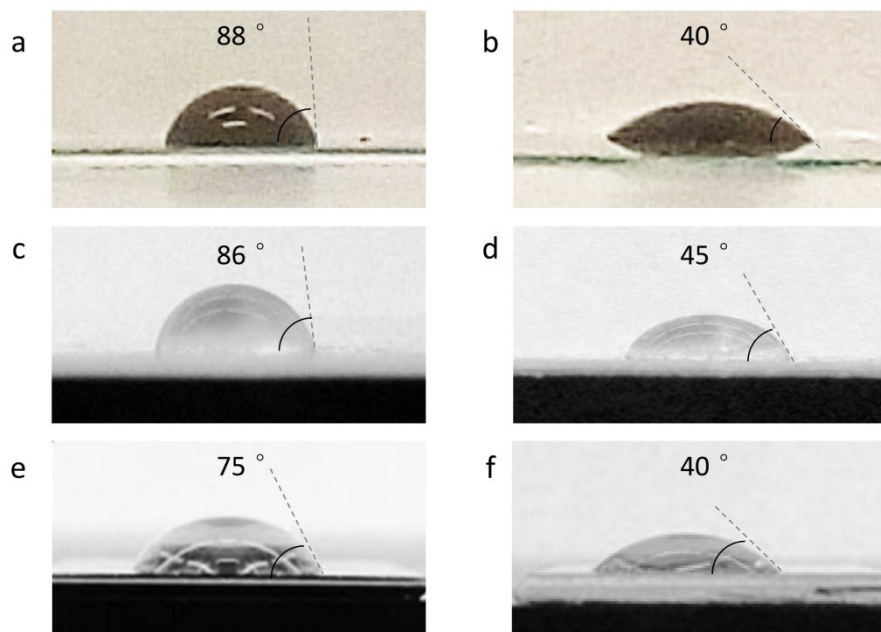

**Figure S5** Water contact angles for graphene films (a) and (b) on PET substrate before and after UVO treatment; (c) and (d) on glass substrate before and after UVO treatment; (e) and (f) on Si/SiO<sub>2</sub> substrate before and after UVO treatment.

## References

- [1] N. Leconte, J. Moser, P. Ordejon, H. H. Tao, A. Lherbier, A. Bachtold, F. Alsina, C. M. S. Torres, J. C. Charlier, S. Roche, *ACS Nano* **2010**, 4, 4033.
- [2] F. GÜNeŞ, G. H. Han, H.-J. Shin, S. Y. Lee, M. Jin, D. L. Duong, S. J. Chae, E. S. Kim, F. E. I. Yao, A. Benayad, J.-Y. Choi, Y. H. Lee, *Nano* **2011**, 06, 409.
- [3] S. Zhao, S. P. Surwade, Z. Li, H. Liu, *Nanotechnology* **2012**, 23, 355703.
- [4] Y. Mulyana, M. Horita, Y. Ishikawa, Y. Uraoka, S. Koh, *Appl. Phys. Lett.* **2013**, 103, 063107.
- [5] Y.-J. Lin, J.-J. Zeng, *Appl. Phys. Lett.* **2013**, 102, 183120.
- [6] M. Hofmann, Y. P. Hsieh, K. W. Chang, H. G. Tsai, T. T. Chen, *Sci Rep* **2015**, 5, 17393.
- [7] K. C. Kwon, W. J. Dong, G. H. Jung, J. Ham, J.-L. Lee, S. Y. Kim, *Sol. Energy Mat. Sol. C.* **2013**, 109, 148.
- [8] M. Z. Iqbal, S. Siddique, M. W. Iqbal, J. Eom, *J. Mater. Chem. C* **2013**, 1, 3078.
- [9] Z. Luo, N. J. Pinto, Y. Davila, A. T. Charlie Johnson, *Appl. Phys. Lett.* **2012**, 100, 253108.
- [10] F. Lin, S.-W. Chen, J. Meng, G. Tse, X.-W. Fu, F.-J. Xu, B. Shen, Z.-M. Liao, D.-P. Yu, *Appl. Phys. Lett.* **2014**, 105, 073103.
